# Supplementary material
Source: PubMed Central journal article supplement (PMC7376900)
Supplement: joces-129-186767-s1.pdf [file joces-129-186767-s1.pdf]

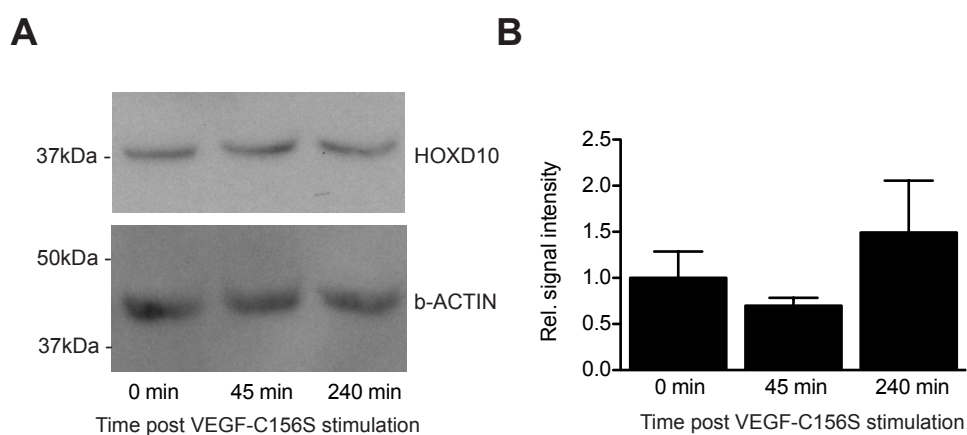

**Supplementary Figure 1: HOXD10 expression in VEGF-C156S stimulated LEC**

(A) Western Blot detection of HOXD10 in LEC treated with VEGF-C156S for 45 min or 240 min. (B) Quantification of HOXD10 band intensity normalized to b-actin band intensity. Bars represent means + SD (n =3). There were no significant changes in the HOXD10 protein level (one-way ANOVA with Dunnett's post-test).

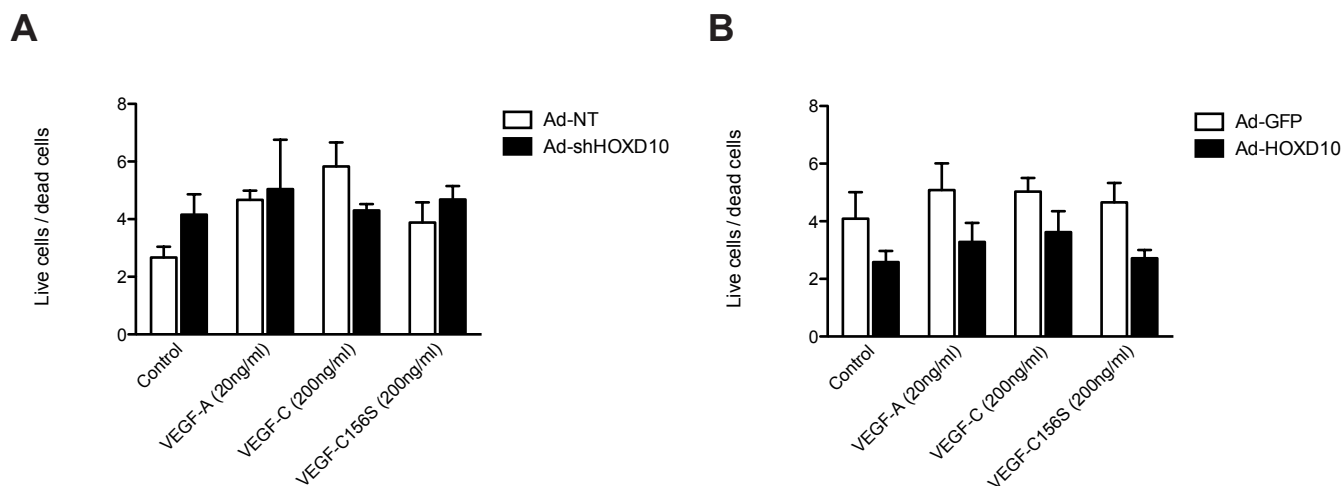

**Supplementary Figure 2: Cell death assessment in LEC after knockdown and overexpression of HOXD10.** LEC were infected with adenovirus to knock down (A) or overexpress HOXD10 (B), and incubated with the indicated growth factors for 72 h. Cell death was assessed by manual counting using trypan blue-excluding viable cells and trypan blue-stained dead cells.

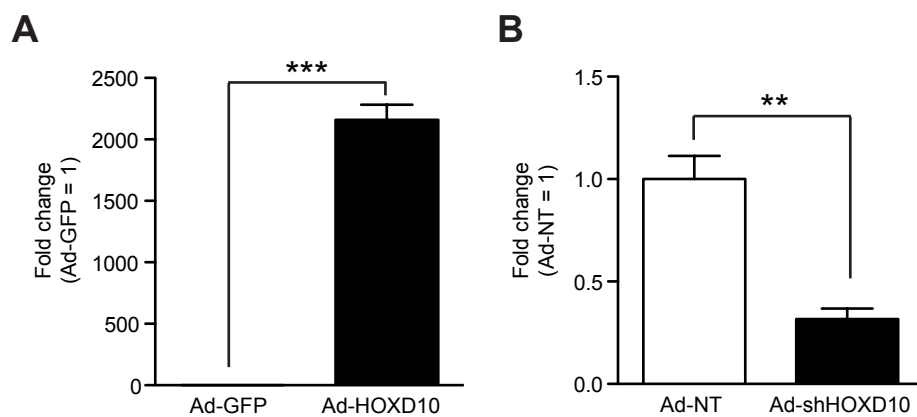

**Supplementary Figure 3: Confirmation of HOXD10 overexpression / knockdown in samples used for CAGE RNA sequencing**

qPCR confirmation of efficient overexpression (A) and knockdown (B) of HOXD10 in LEC 24h after infection with Ad-HOXD10 and Ad-shHOXD10, respectively. The same samples were used for the CAGE RNA sequencing in Figure 6. Bars represent means + SD (n = 3).

\*\*p<0.01, \*\*\*p<0.001 (Student's t-test).

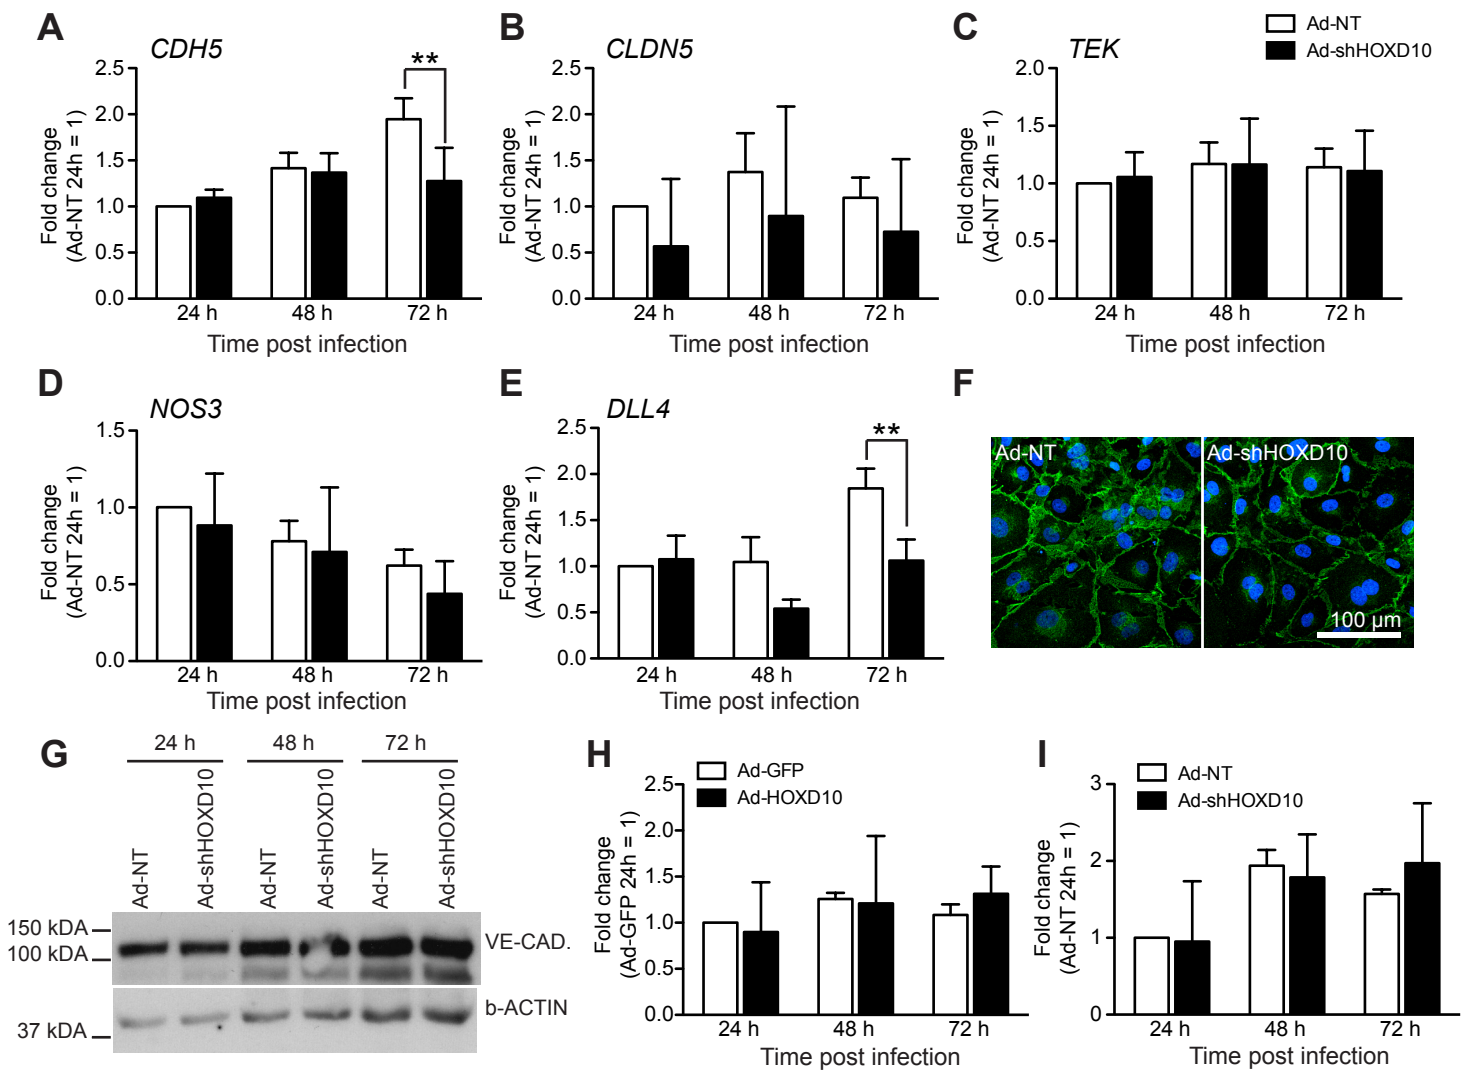

**Supplementary Figure 4: HOXD10 knockdown does not significantly affect expression of CDH5, CLDN5, TEK, NOS3, DLL4 and HOXD8 in LEC**

(A-E) LEC were infected with adenovirus to knock down HOXD10 (Ad-shHOXD10) or control virus (Ad-NT), and expression of selected target genes CDH5 (A), CLDN5 (B), TEK (C), NOS3 (D) and DLL4 (E) was determined by qPCR after 24 h, 48 h, and 72 h. Bars represent mean + SD (pooled data from 4 individual experiments). \*\* $p < 0.01$  (Two-way ANOVA with bonferroni post-test).

(F) Representative microscopic images of Ve-Cadherin staining in LEC monolayers 72 h after infection with Ad-NT and Ad-shHOXD10. (G) Western Blot analysis of total cellular Ve-Cadherin in LEC 24 h, 48 h, and 72 h after infection with Ad-NT and Ad-shHOXD10. (H-I) LEC were infected with adenovirus to overexpress (H) or knock down HOXD10 (I), and expression of HOXD8 was determined by qPCR after 24 h, 48 h, and 72 h. Bars represent mean + SD. (pooled data from 3 individual experiments).

### Supplementary Table 1: Table of predicted transcription factor activity according to oPOSSUM3 Z-scores and Fisher-Scores

List of predicted active transcription factors identified by oPOSSUM3 analysis, showing significant enrichment of corresponding TFBS in promoters of differentially expressed genes (Z-score) and significant enrichment of the number of promoters with at least one corresponding TFBS (Fisher-Score) at all time points of the analysis.

above significance threshold (>mean+1.5xSD)

| time point | TF         | Z-score | Fisher -score | time point | TF      | Z-score     | Fisher -score |       |
|------------|------------|---------|---------------|------------|---------|-------------|---------------|-------|
| 15 min     | HOXD10     | 24.909  | 12.582        | 150 min    | SRF     | 27.17       | 6.967         |       |
|            | EGR1       | 22.816  | 10.527        |            | HOXD8   | 10.918      | 3.046         |       |
|            | NKX3-1     | 22.093  | 7.343         |            | TBP     | 10.705      | 3.943         |       |
|            | ELK1       | 21.164  | 6.878         |            | HOXA7_2 | 10.554      | 3.856         |       |
|            | E2F1       | 20.657  | 14.561        |            | PDX1    | 7.03        | 3.918         |       |
|            | FOXD1      | 20.348  | 5.778         |            | HOXA7-2 | 10.554      | 3.856         |       |
|            | NKX2-5     | 18.322  | 1.62          |            | LHX3    | 5.067       | 3.551         |       |
|            | SRY        | 18.044  | 5.494         |            | GFI     | 3.436       | 3.455         |       |
|            | ELK4       | 15.077  | 8.978         |            | FOXD1   | 6.52        | 3.393         |       |
|            | IRF1       | 13.16   | 8.874         |            | NKX2-5  | 5.235       | 3.387         |       |
|            | MAFB_2     | 13.647  | 8.504         |            | 180 min | SRF         | 18.52         | 5.705 |
|            | ARNT       | 11.084  | 8.185         |            |         | TBP         | 16.898        | 9.18  |
|            | TBP        | 7.527   | 7.378         |            |         | PAX4        | 15.643        | 1.751 |
|            | GABPA      | 15.44   | 7.359         |            |         | SRY         | 13.797        | 2.042 |
|            | HOXA9      | 13.639  | 7.05          |            |         | HOXD8       | 13.427        | 4.785 |
|            | MIZF       | 12.956  | 7.023         |            |         | HIF1A::ARNT | 8.387         | 3.719 |
|            | NFIL3      | 10.551  | 6.49          |            |         | ARNT        | 6.042         | 5.004 |
| 30 min     | SRF        | 31.177  | 12.142        | NFIL3      | 2.838   | 3.191       |               |       |
|            | HOXD8      | 13.034  | 4.836         | 210 min    | SRF     | 25.144      | 7.966         |       |
|            | E2F1       | 11.462  | 2.972         |            | MAFB_1  | 14.107      | 3.405         |       |
|            | NFKB1      | 10.593  | 1.149         |            | TBP     | 12.062      | 6.992         |       |
|            | IRF1       | 9.173   | 2.207         |            | NFKB1   | 10.197      | 2.394         |       |
|            | HOXA7_2    | 9.166   | 2.255         |            | PLAG1   | 9.117       | 2.039         |       |
|            | PBX1       | 8.973   | 4.477         |            | MAX     | 8.515       | 2.514         |       |
|            | PLAG1      | 8.901   | 1.856         |            | E2F1    | 8.164       | 1.815         |       |
|            | TBP        | 8.197   | 8.206         | FOXO3      | 5.393   | 4.125       |               |       |
| HOXD10     | 5.249      | 3.545   | HOXD8         | 6.925      | 3.041   |             |               |       |
| 45 min     | SRF        | 34.767  | 13.54         | GFI        | 6.681   | 2.924       |               |       |
|            | TBP        | 19.344  | 9.684         | FOXQ1      | 0.007   | 2.823       |               |       |
|            | EWSR1-FLI1 | 13.41   | 0.151         | PDX1       | -0.17   | 2.809       |               |       |
|            | MAFB-1     | 11.033  | 2.88          | 240 min    | SRF     | 34.478      | 11.435        |       |
|            | STAT1      | 9.088   | 3.372         |            | REST    | 20.384      | 4.783         |       |
| 60 min     | SRF        | 26.22   | 10.201        |            | NFATC2  | 13.148      | 1.648         |       |
|            | TBP        | 13.236  | 8.11          |            | FOXD1   | 11.775      | 2.914         |       |
|            | MAFB 1     | 11.023  | 2.314         |            | TBP     | 11.112      | 6.038         |       |
|            | FOXI1      | 8.716   | 1.451         |            | FOXD3   | 4.705       | 4.171         |       |
|            | ARNT       | 5.216   | 2.93          |            | STAT3   | 6.161       | 3.571         |       |
| RELA       | 5.476      | 2.905   | PBX1          | 5.53       | 3.084   |             |               |       |
| 80 min     | SRF        | 11.53   | 4.179         | 300 min    | EGR1    | 28.073      | 23.332        |       |
|            | CTCF       | 10.637  | 1.951         |            | ELK1    | 26.499      | 5.726         |       |
|            | TBP        | 9.753   | 2.037         |            | NKX2-5  | 24.604      | 1.876         |       |
|            | TAL1::TCF3 | 8.035   | 2.653         |            | SRY     | 23.808      | 6.324         |       |
|            | HNF1B      | 7.0404  | 2.554         |            | NKX3-1  | 22.268      | 7.673         |       |
|            | NFATC2     | 8.134   | 1.071         |            | ARID3A  | 21.874      | 2.636         |       |
|            | PLAG1      | 7.894   | 1.378         |            | TBP     | 21.094      | 11.499        |       |
|            | ZFP423     | 6.39    | 2.17          |            | E2F1    | 20.7        | 16.347        |       |
|            | MYC::MAX   | 4.477   | 2.902         |            | HOXD10  | 19.956      | 7.024         |       |
|            | RELA       | 3.762   | 2.634         |            | SOX5    | 13.945      | 10.564        |       |

|                |               |        |       |                |             |        |        |
|----------------|---------------|--------|-------|----------------|-------------|--------|--------|
|                | TP53          | N/A    | 2.389 |                | ELK4        | 16.723 | 9.728  |
|                | HAND1::TCFE2A | 1.472  | 1.882 |                | FOXI1       | 13.351 | 9.726  |
|                | HOXD10        | 0.925  | 1.81  |                | GABPA       | 19.492 | 9.094  |
| <b>100 min</b> | SRF           | 32.054 | 6.194 |                | FOXD3       | 12.02  | 8.868  |
|                | TBP           | 17.482 | 2.839 |                | HIF1A::ARNT | 14.447 | 8.284  |
|                | RREB1         | 13.221 | 3.335 | <b>360 min</b> | SRF         | 27.25  | 10.135 |
|                | NR3C1         | 7.829  | 0.697 |                | MAFB_1      | 22.316 | 7.642  |
|                | NKX3-2        | 7.623  | 0     |                | TBP         | 13.939 | 6.933  |
|                | FOXQ1         | 4.439  | 3.853 |                | NFKB1       | 10.202 | 4.662  |
|                | SOX5          | -0.245 | 2.01  |                | RELA        | 9.416  | 5.148  |
|                |               |        |       |                | HOXD10      | 9.147  | 2.013  |
| <b>120 min</b> | SRF           | 15.871 | 3.585 |                | NR3C1       | 8.62   | 2.426  |
|                | MZF1_5-13     | 11.436 | 0.862 |                | PBX1        | 7.037  | 3.432  |
|                | NFATC2        | 9.782  | 0.512 | <b>420 min</b> | SRF         | 23.465 | 9.49   |
|                | E2F1          | 9.617  | 0.707 |                | RELA        | 15.047 | 11.23  |
|                | HIF1A::ARNT   | 8.641  | 2.746 |                | TBP         | 12.703 | 8.259  |
|                | NFKB1         | 8.443  | 2.152 |                | NFKB1       | 12.176 | 3.518  |
|                | REST          | 7.302  | 1.642 |                | NFKB        | 8.221  | 0.494  |
|                | NFYA          | 6.867  | 3.844 |                | NHLH1       | 7.558  | 1.882  |
|                | FOXO3         | -1.354 | 3.531 | <b>480 min</b> | SRF         | 20.836 | 7.884  |
|                | SRY           | 3.554  | 2.886 |                | MZF1_5_13   | 13.466 | 0.67   |
|                | FOXD1         | -1.421 | 2.745 |                | HOXD8       | 12.747 | 4.292  |
|                | ELK4          | 1.743  | 2.462 |                | PPARG       | 12.627 | 1.751  |
|                | PDX1          | 0.611  | 2.441 |                | PLAG1       | 10.741 | 2.811  |
|                | LHX3          | 4.697  | 2.213 |                | EWSR1-FLI1  | 9.808  | 0.637  |
|                | TBP           | 5.089  | 2.145 |                | NFKB1       | 7.722  | 1.593  |
|                | EGR1          | 3.81   | 2.142 |                | TBP         | 6.958  | 6.754  |
|                |               |        |       |                | MEF2A       | 5.956  | 2.959  |
|                |               |        |       |                | SRY         | 2.083  | 2.783  |
|                |               |        |       |                | SOX5        | 1.684  | 2.666  |

### Supplementary Table 2: Predicted HOXD10 target genes

List of HOXD10 target genes (identified by the presence of HOXD10 TFBS in the core promoter) that were found up-regulated at the respective time points of predicted HOXD10 activity, indicated by “X”.

| Gene   | Time point [min] with significant HOXD10 activity |    |    |     |     |
|--------|---------------------------------------------------|----|----|-----|-----|
|        | 15                                                | 30 | 80 | 300 | 360 |
| CSRNP1 |                                                   | X  |    | X   | X   |
| DDX60  | X                                                 | X  |    |     | X   |
| DNAJB4 | X                                                 | X  |    | X   |     |
| DUSP5  |                                                   | X  |    | X   | X   |
| FOSB   |                                                   | X  | X  | X   | X   |
| GIMAP7 | X                                                 | X  |    | X   |     |
| HES1   |                                                   | X  |    | X   | X   |
| MMRN1  | X                                                 | X  |    | X   |     |
| NR4A1  |                                                   | X  | X  | X   | X   |
| SPRY4  |                                                   | X  |    | X   | X   |

### Supplementary Table 3

[Click here to Download Table S3](#)

**Supplementary Table 4: GO annotation of up- and downregulated genes in cells overexpressing HOXD10**

List of the 10 most significantly enriched GO "biologic process" (BP) terms among the up- and downregulated genes identified by CAGE RNA sequencing in LEC overexpressing HOXD10.

*Upregulated genes:*

| Term                                                      | P-value     | Genes                                                                                                                                                                                                                                                                                                     |
|-----------------------------------------------------------|-------------|-----------------------------------------------------------------------------------------------------------------------------------------------------------------------------------------------------------------------------------------------------------------------------------------------------------|
| Positive regulation of I-kappaB kinase/NF-kappaB cascade  | 3.11E-04    | LITAF, BST2, TBK1, TFG, NDFIP2, TLR3, TLR4, MAP3K7, TRIM38, TMEM9B, ATP2C1, IL1B, HTR2B                                                                                                                                                                                                                   |
| Negative regulation of cell death                         | 6.41E-04    | MEF2C, YWHAZ, XIAP, CLU, TGFB3, HSPA1A, NFKB1, BCL2L1, HSPA1B, MAP3K7, BAG3, CDKN2D, IL1B, NOS3, TAF9, FAS, RASA1, PIK3CG, IL6, SLC25A4, IL7, IGF1, CSDA, FURIN, ATM, AMIGO2, DHRS2, UBB, PRNP                                                                                                            |
| Regulation of I-kappaB kinase/NF-kappaB cascade           | 7.67E-04    | LITAF, BST2, TBK1, TFG, NDFIP2, TLR3, TLR4, MAP3K7, TRIM38, TMEM9B, ATP2C1, IL1B, HTR2B                                                                                                                                                                                                                   |
| Positive regulation of cellular biosynthetic process      | 8.98E-04    | MEF2C, ELF1, TGFB3, TLR3, TLR4, NFKB1, FOS, SORBS1, IL1B, PDGFC, TAF9, YAP1, RARB, FAM129A, ASF1A, ETV4, RNF14, EGR1, IL6, SMAD9, KLF12, CCNH, PCBD1, CD276, IGF1, MED14, CDK7, TOPORS, SMAD1, KAT5, WWTR1, MECOM, STAT3, ATF6, PTHLH, PLA2G4A, PKNOX1, NCOA2, NCOA4, GTF2F1, UBB, SMARCA2, RNF20, MAPRE3 |
| Negative regulation of apoptosis                          | 0.001084321 | MEF2C, YWHAZ, XIAP, CLU, TGFB3, HSPA1A, NFKB1, BCL2L1, HSPA1B, MAP3K7, BAG3, CDKN2D, IL1B, NOS3, TAF9, FAS, RASA1, PIK3CG, IL6, IL7, IGF1, CSDA, FURIN, ATM, AMIGO2, DHRS2, UBB, PRNP                                                                                                                     |
| Positive regulation of biosynthetic process               | 0.001174285 | MEF2C, ELF1, TGFB3, TLR3, TLR4, NFKB1, FOS, SORBS1, IL1B, PDGFC, TAF9, YAP1, RARB, FAM129A, ASF1A, ETV4, RNF14, EGR1, IL6, SMAD9, KLF12, CCNH, PCBD1, CD276, IGF1, MED14, CDK7, TOPORS, SMAD1, KAT5, WWTR1, MECOM, STAT3, ATF6, PTHLH, PLA2G4A, PKNOX1, NCOA2, NCOA4, GTF2F1, UBB, SMARCA2, RNF20, MAPRE3 |
| Positive regulation of macromolecule biosynthetic process | 0.001209855 | MEF2C, ELF1, TGFB3, TLR3, TLR4, NFKB1, FOS, SORBS1, IL1B, TAF9, PDGFC, YAP1, RARB, FAM129A, ASF1A, ETV4, RNF14, EGR1, IL6, SMAD9, KLF12, CCNH, PCBD1, CD276, IGF1, MED14, CDK7, TOPORS, SMAD1, KAT5, WWTR1, MECOM, STAT3, ATF6, PKNOX1, NCOA2, NCOA4, GTF2F1, UBB, SMARCA2, RNF20, MAPRE3                 |
| Negative regulation of programmed cell death              | 0.001330821 | MEF2C, YWHAZ, XIAP, CLU, TGFB3, HSPA1A, NFKB1, BCL2L1, HSPA1B, MAP3K7, BAG3, CDKN2D, IL1B, NOS3, TAF9, FAS, RASA1, PIK3CG, IL6, IL7, IGF1, CSDA, FURIN, ATM, AMIGO2, DHRS2, UBB, PRNP                                                                                                                     |
| Regulation of growth                                      | 0.001380527 | EXTL3, TSG101, LTBP4, ZMAT3, GREM1, DDR2, TSPYL2, CDKN2C, TRO, CDKN2D, CAMK2D, TAF9, SEMA3A, MUC12, MAP2K5, IL7, SOCS1, IGF1, KAT5, CSDA, STAT3, DDR1,                                                                                                                                                    |



|                                           |             |                                                                                                                                                                                        |
|-------------------------------------------|-------------|----------------------------------------------------------------------------------------------------------------------------------------------------------------------------------------|
|                                           |             | CTH, RUVBL2, UBB, KCTD11                                                                                                                                                               |
| Negative regulation of cell proliferation | 0.001439549 | RARRES1, PTGS2, TSG101, TGFB3, IFI30, CHEK1, IL15, MXI1, CDKN2C, KIFAP3, CDKN2D, IL1B, NOS3, RARB, TINF2, FGFBP1, IL6, IL8, AIMP1, CD276, SF1, SMAD1, PTHLH, DHRS2, DDR1, CTH, SMARCA2 |

*Downregulated genes:*

| Term                                       | P-value  | Genes                                                                                                                                                                                                  |
|--------------------------------------------|----------|--------------------------------------------------------------------------------------------------------------------------------------------------------------------------------------------------------|
| Regulation of cell migration               | 1.26E-06 | DLC1, ACVRL1, PDGFB, PDGFA, IL6ST, BCAR1, JAG2, KIT, CXCL12, SPAG9, CXCR4, DLL4, TEK, ROBO4                                                                                                            |
| Cell proliferation                         | 1.82E-06 | BMP4, BCAT1, ERG, LIPA, TNFSF4, PDGFB, PDGFA, BCAR1, E2F8, MOV10L1, KIT, CXCL12, CTNNB1, GPC4, ZFP36L2, EVI5, IRF6, CXCR4, TXNRD1, HHIP, MYC, MYH10                                                    |
| Regulation of phosphorus metabolic process | 2.73E-06 | DLC1, BMP4, CAV1, PDGFB, PDGFA, IL6ST, C13ORF15, TNFSF15, PKMYT1, TLR4, KIT, PRKCE, INHBA, SPAG9, ADRB2, SPRY1, CCND2, CXCR4, RGS3, RGS4, TNK2, GADD45B, ENG                                           |
| Regulation of phosphate metabolic process  | 2.73E-06 | DLC1, BMP4, CAV1, PDGFB, PDGFA, IL6ST, C13ORF15, TNFSF15, PKMYT1, TLR4, KIT, PRKCE, INHBA, SPAG9, ADRB2, SPRY1, CCND2, CXCR4, RGS3, RGS4, TNK2, GADD45B, ENG                                           |
| Regulation of cell proliferation           | 4.32E-06 | DLC1, CAV1, ACVRL1, LST1, PDGFB, PDGFA, IL6ST, PPARG, TNFSF15, JAG2, GJA1, BCL2L1, KIT, PAWR, CDH5, CTNNB1, WARS, TEK, SERPINE1, TGM2, CSK, MYC, BMP4, TNFSF4, PDCD1LG2, TNS3, ADRB2, CCND2, IRF6, ENG |
| Regulation of phosphorylation              | 5.16E-06 | BMP4, CAV1, PDGFB, PDGFA, IL6ST, C13ORF15, TNFSF15, PKMYT1, TLR4, KIT, PRKCE, INHBA, SPAG9, ADRB2, SPRY1, CCND2, CXCR4, RGS3, RGS4, TNK2, GADD45B, ENG                                                 |
| Regulation of locomotion                   | 5.20E-06 | DLC1, ACVRL1, PDGFB, PDGFA, IL6ST, BCAR1, JAG2, KIT, CXCL12, SPAG9, CXCR4, DLL4, TEK, ROBO4                                                                                                            |
| Regulation of cell motion                  | 5.51E-06 | DLC1, ACVRL1, PDGFB, PDGFA, IL6ST, BCAR1, JAG2, KIT, CXCL12, SPAG9, CXCR4, DLL4, TEK, ROBO4                                                                                                            |
| Blood vessel development                   | 1.58E-05 | BMP4, CAV1, ACVRL1, PDGFA, ELK3, GJA4, CXCL12, CDH5, CTNNB1, CXCR4, DLL4, ROBO4, TGM2, SOX17, ENG                                                                                                      |
| Vasculature development                    | 2.07E-05 | BMP4, CAV1, ACVRL1, PDGFA, ELK3, GJA4, CXCL12, CDH5, CTNNB1, CXCR4, DLL4, ROBO4, TGM2, SOX17, ENG                                                                                                      |

### Supplementary Table 5: List of qPCR primers

Gene names are provided as well as their corresponding forward and reverse primer sequence used in qPCR analyses.

qPCR primers used for detection of human genes:

| Gene   | Forward                 | Reverse                 |
|--------|-------------------------|-------------------------|
| RPLP0  | CAGATTGGCTACCCAAGTGGT   | GGGAAGGTGTAATCCGTCTCC   |
| HOXD10 | GACATGGGGACCTATGGAATGC  | CGGATCTGTCCAAGTGTCTACT  |
| FOSB   | GCTGCAAGATCCCCTACGAAG   | CCGGCAAATCTCTCACCTCC    |
| NR4A1  | CCCTGAAGTTGTTCCCCTCAC   | CCGTAGGCATGGAATAGCTCT   |
| CDH5   | GATCAAGTCAAGCGTGAGTCG   | AGCCTCTCAATGGCGAACAC    |
| CLDN5  | GGGAACCTCCTGAAGTGGTGT   | TCCCATGGCAAACAGAGAGG    |
| TEK    | TTAGCCAGCTTAGTTCTCTGTGG | AGCATCAGATACAAGAGGTAGGG |
| NOS3   | TGATGGCGAAGCGAGTGAAG    | ACTCATCCATACACAGGACCC   |
| DLL4   | TGGGTCAGAACTGGTTATTGGA  | GTCATTGCGCTTCTTGACACAG  |
| HOXD8  | TCAAATGTTTCCGTGGATGAG   | AGAGTTTGGAAGCGACTGTAG   |

qPCR primers used for detection of mouse genes

| Gene   | Forward                | Reverse                |
|--------|------------------------|------------------------|
| RPLP0  | AGATTTCGGGATATGCTGTTGG | TCGGGTCCTAGACCAGTGTTTC |
| HOXD10 | GGCCTTCCAGAAGACAGGAG   | AGCCAATTGCTGGTTGGAGT   |
